# Supplementary material for: Self-degrading functional unit introduction for anti-oxidation ability enhancement of a poly(vinyl ethylene carbonate) electrolyte
Source: Royal Society of Chemistry journal article supplement (doi:10.1039/d3ta07652k), 2024-01-01
Supplement: d3ta07652k1.pdf [file d3ta07652k1.pdf]

## Supporting information

### **Self-degradation functional unit introduction for anti-oxidation ability enhancement of Poly(vinyl ethylene carbonate) electrolyte**

Zhiyuan Lin <sup>a,b,1</sup>, Fang Chen <sup>a,1</sup>, Xin Yin <sup>c,d,1</sup>, Peipei Ding <sup>c</sup>, Yonggao Xia <sup>a,e,\*</sup>, Xianwei Guo <sup>c</sup>,  
\*, Haijun Yu <sup>c</sup>

<sup>a</sup> College of New Energy, Ningbo University of Technology, Ningbo 315336, PR China

<sup>b</sup> Yinyi Group co.,ltd, Ningbo, 315000, PR China

<sup>c</sup> Institute of Advanced Battery Materials and Devices, Faculty of Materials and  
Manufacturing, Beijing University of Technology, Beijing 100124, PR China

<sup>d</sup> Beijing WeLion New Energy Technology Co., Ltd., Beijing 102600, PR China

<sup>e</sup> Ningbo Institute of Materials Technology and Engineering, Chinese Academy of Sciences,  
Ningbo 315201, China

\* Corresponding author: Yonggao Xia (xiayg@nimte.ac.cn), Xianwei Guo  
(xwguo@bjut.edu.cn)

<sup>1</sup> These authors contributed equally to this work.

## Supplementary Figures

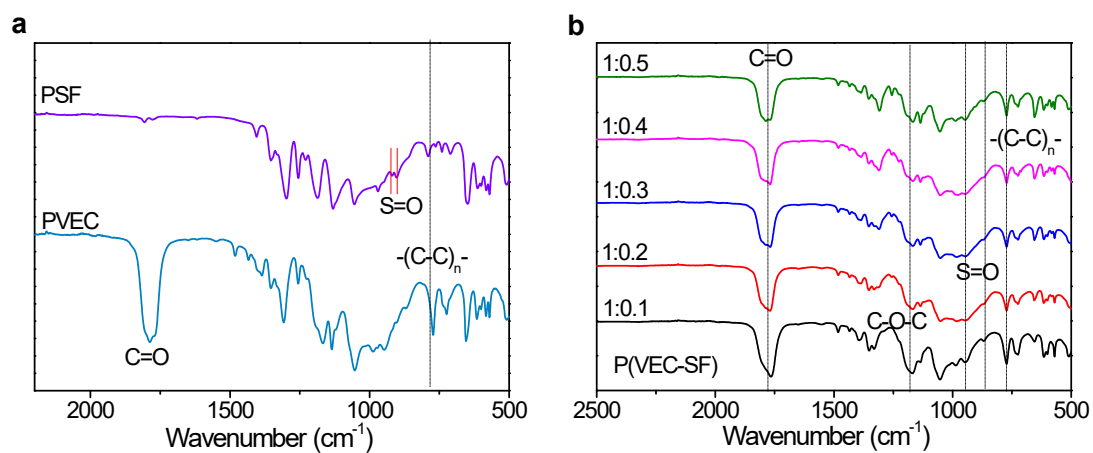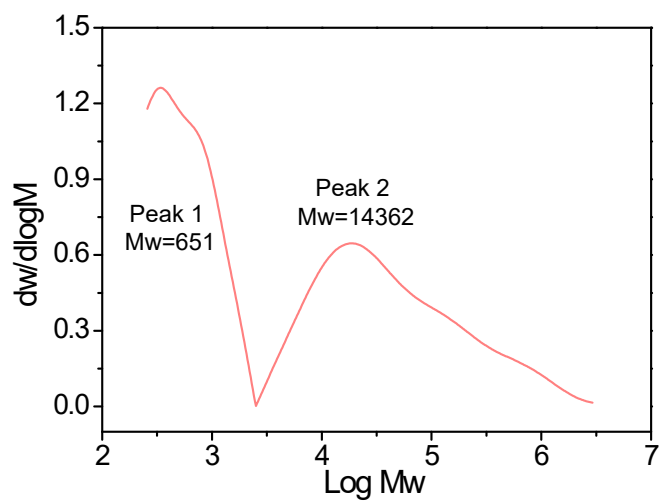

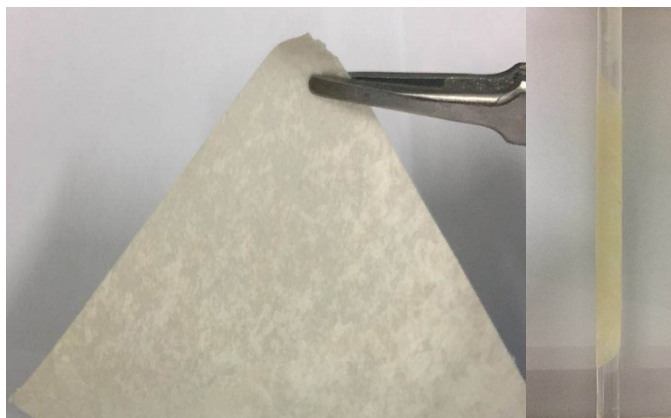

**Figure S3.** The photograph of flexible P(VEC-SF)-PE film with tunable size.

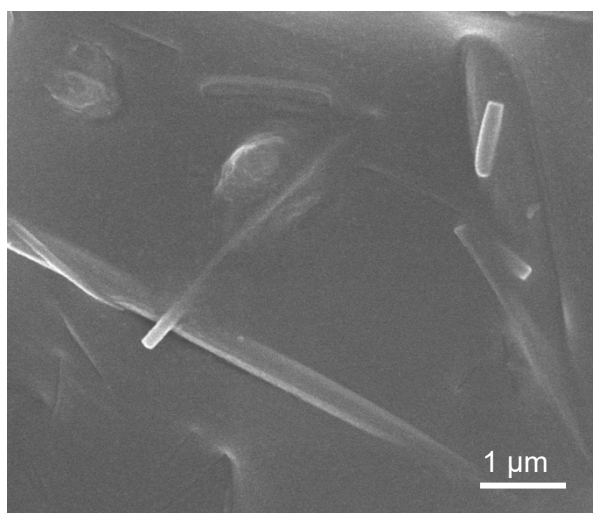

**Figure S4.** SEM of the P(VEC-SF)-PE.

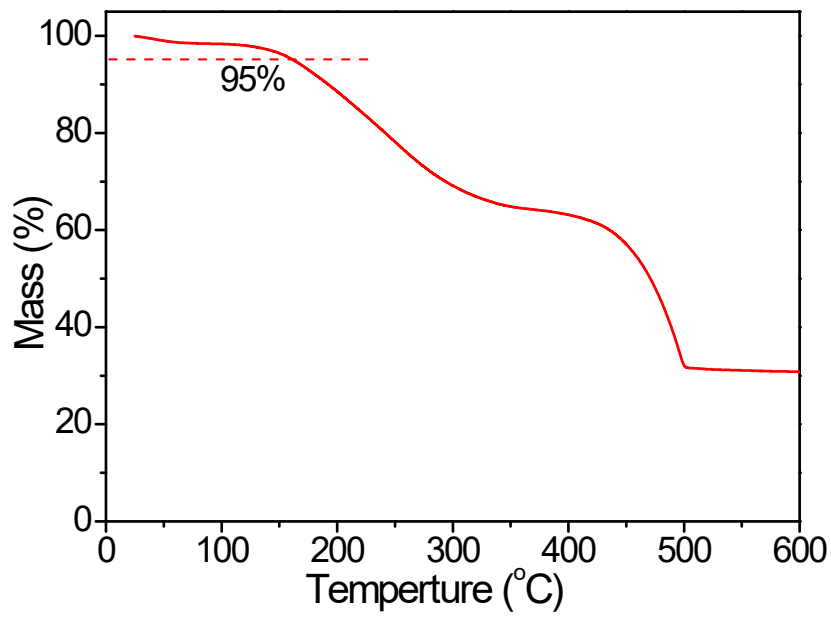

**Figure S5.** The TG curves of P(VEC-SF)-PE.

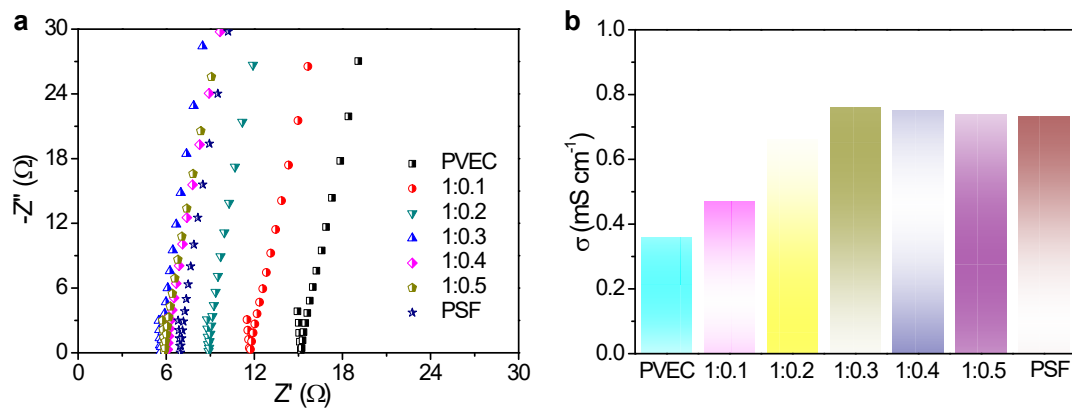

**Figure S6. a,** EIS of SS/PVEC-PE /SS battery, SS/PSF/SS battery and SS/P(VEC-SF)-PE /SS battery that P(VEC-SF)-PE with different content of PSF. **b,** ionic conductivity of P(VEC-SF)-PE with different content of PSF at room temperatures.

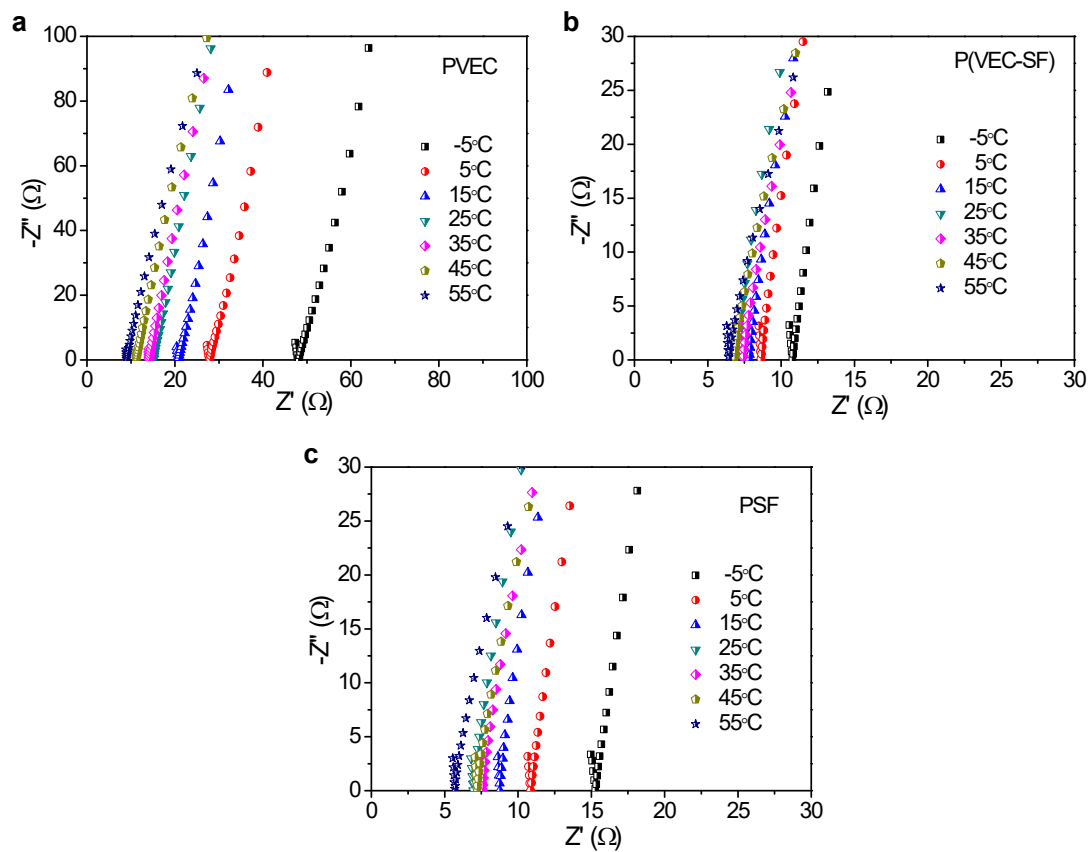

**Figure S7.** EIS of **a**, SS/PVEC-PE/SS battery, **b**, SS/P(VEC-SF)-PE/SS battery and **c**, SS/PSF-PE/SS battery at different temperatures.

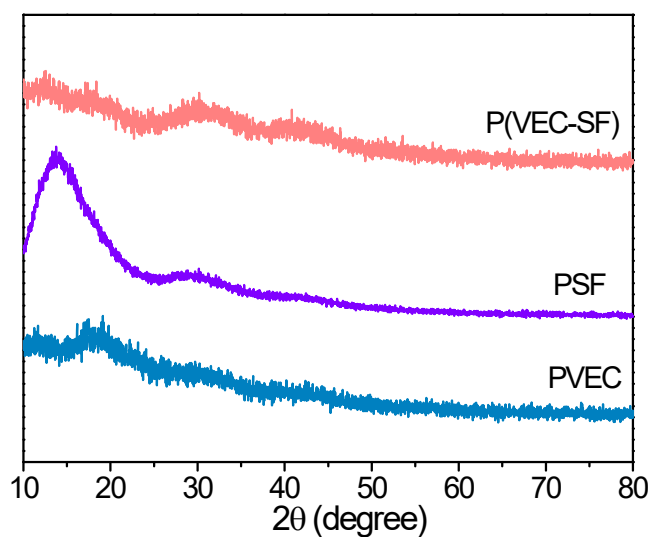

**Figure S8.** XRD pattern of PVEC-PE, PSF-PE and P(VEC-SF)-PE.

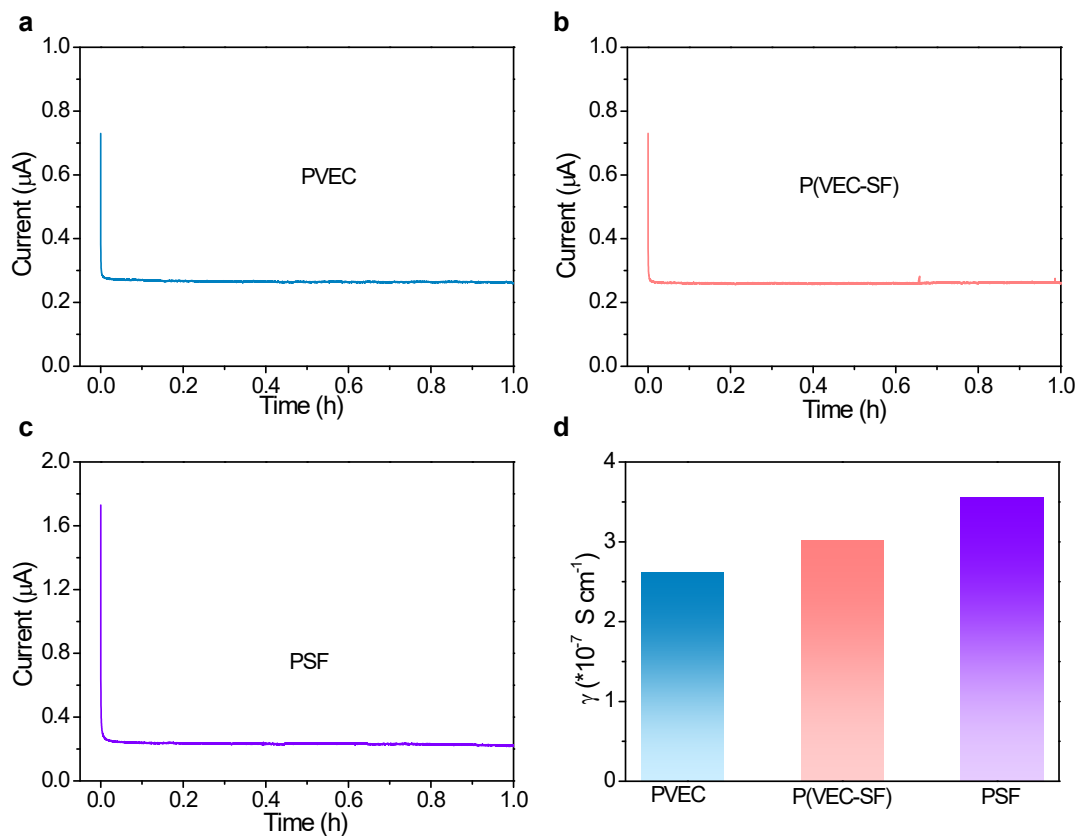

**Figure S9.** Potentiostatic coulometry measurement of **a**, SS/PVEC-PE/SS battery, **b**, SS/P(VEC-SF)-PE/SS battery and **c**, SS/PSF-PE/SS battery. **d**, electronic conductivity of PVEC-PE, PSF-PE and P(VEC-SF)-PE.

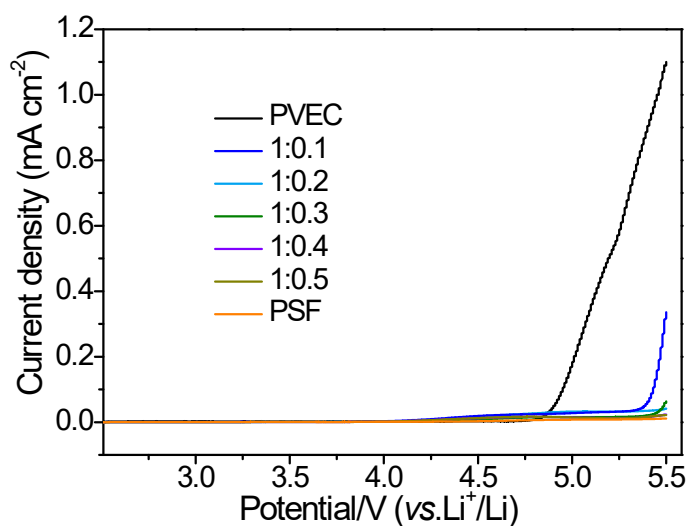

**Figure S10.** LSV profile of Li/PVEC-PE/SS battery, Li/PSF-PE/SS battery and Li/P(VEC-SF)-PE/SS battery that P(VEC-SF)-PE with different content of PSF-PE.

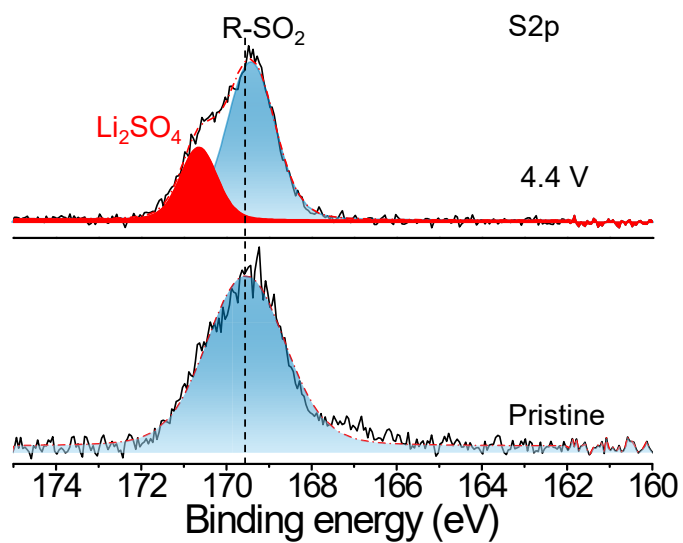

**Figure S11.** The S2p XPS spectra of PSF-PE after different constant current-current voltage charging tests.

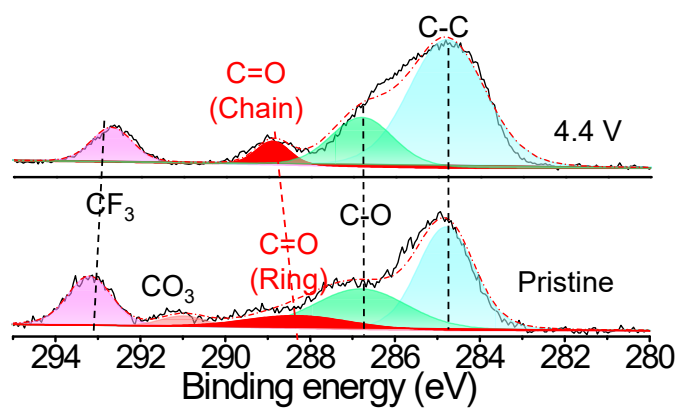

**Figure S12.** The C1s XPS spectra of PVEC-PE after different constant current-current voltage charging tests.

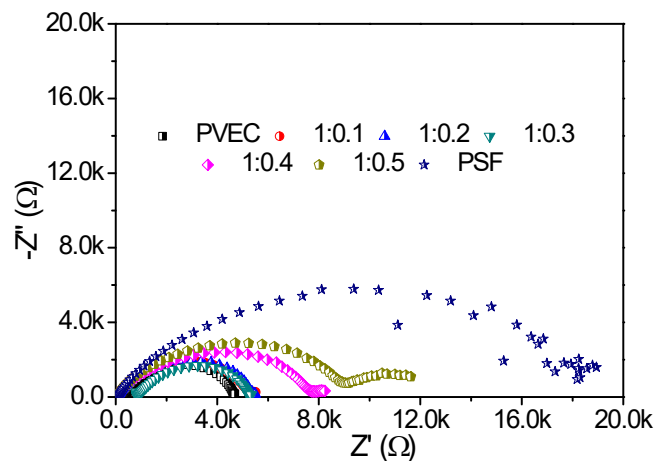

**Figure S13.** The EIS of Li/PVEC-PE/Li battery, Li/PSF-PE/Li battery and Li/P(VEC-SF)-PE/Li battery that P(VEC-SF)-PE with different content of PSF.

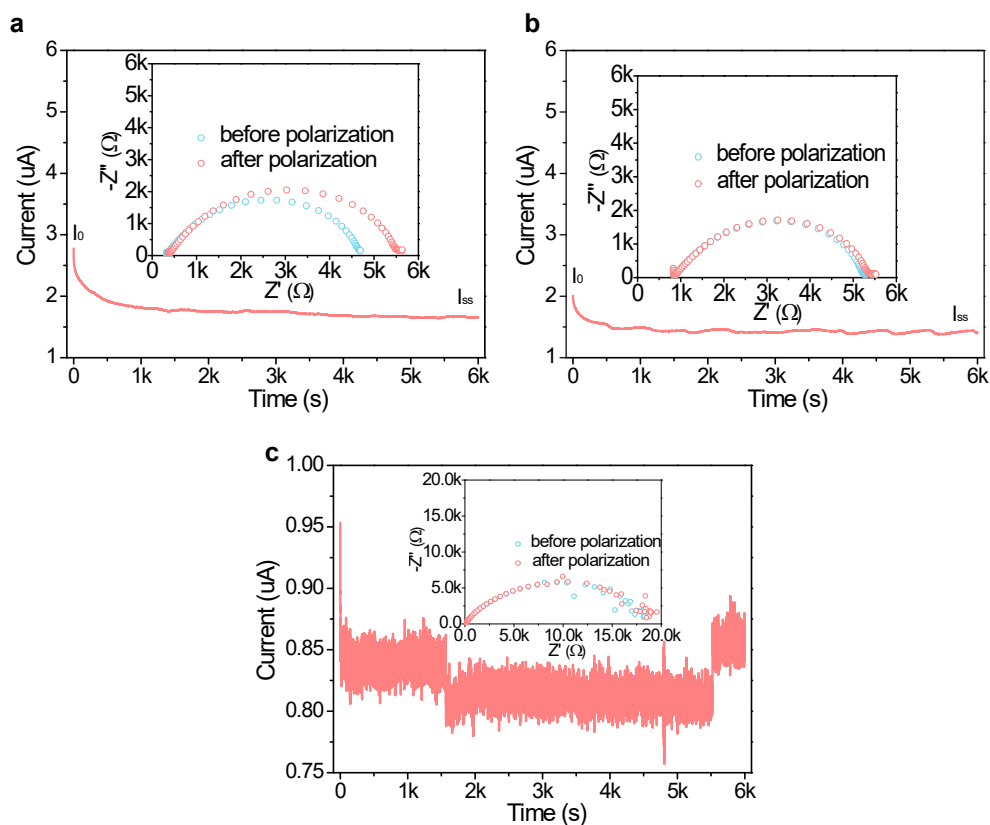

**Figure S14.** Chronoamperometry profile of the **a**, Li/PVEC-PE/Li battery, **b**, Li/P(VEC-SF)-PE/Li battery and **c**, Li/PSF-PE/Li battery under a polarization potential of 10 mV, and the EIS before and after the polarization (insert).



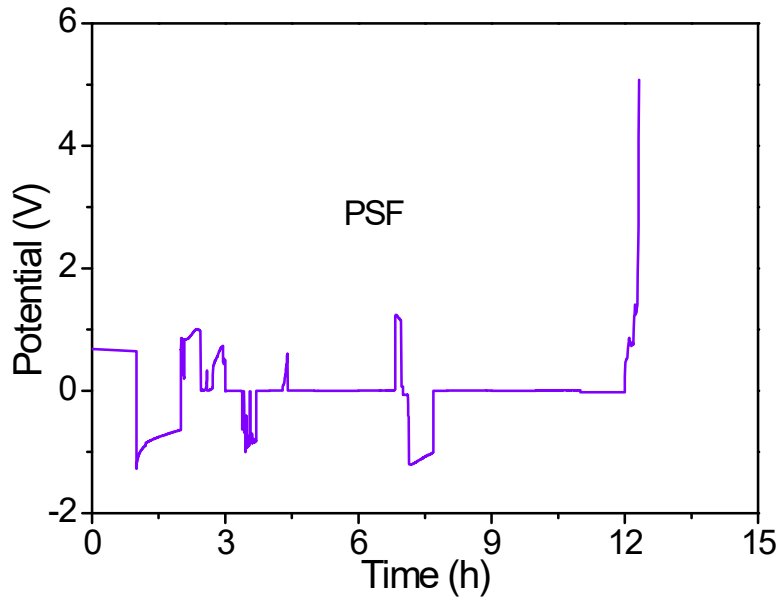

**Figure S15.** The potential profiles of repeated Li plating/stripping in Li/PSF-PE/Li battery with current density of  $0.5 \text{ mA cm}^{-2}$ .

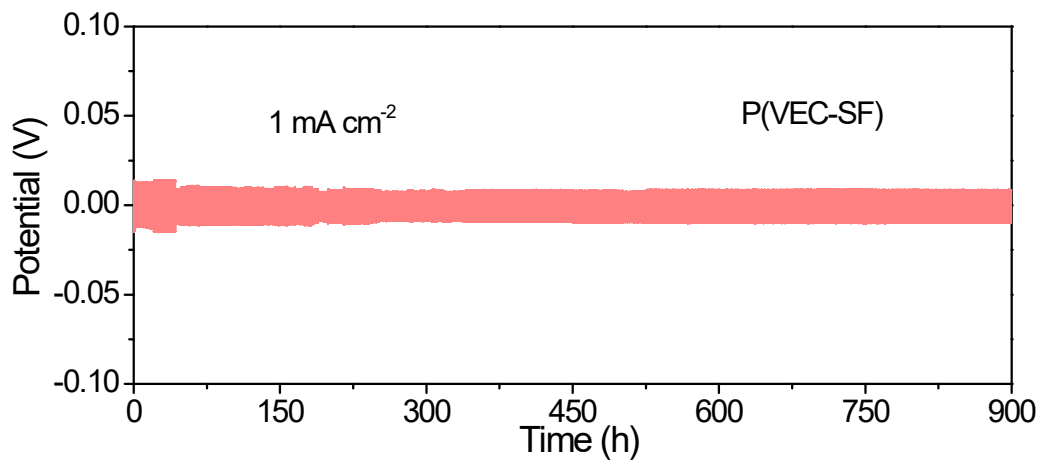

**Figure S16.** The potential profiles of repeated Li plating/stripping in Li/P(VEC-SF)-PE/Li battery with current density of  $1 \text{ mA cm}^{-2}$ .

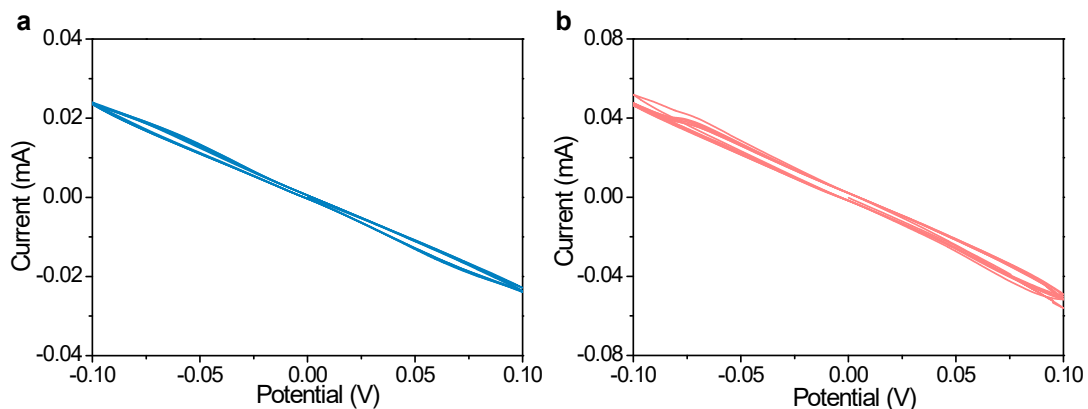

**Figure S17.** CV curve of **a**, Li/PVEC-PE/Li battery and **b**, Li/P(VEC-SF)-PE/Li battery in a voltage range of -0.1-0.1 V over 5 cycles.

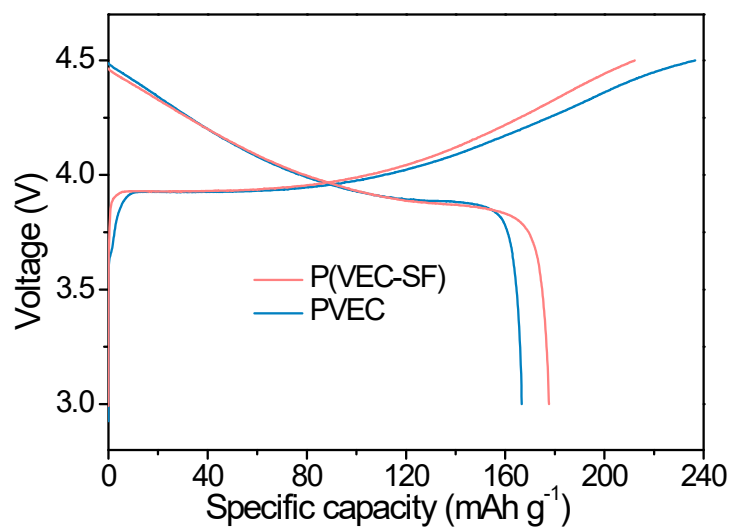

**Figure S18.** Typical charge-discharge curves of LCO/PVEC-PE/Li and LCO/P(VEC-SF)-PE/Li batteries in the voltage range of 3.0-4.5 V at current density of 0.1 C.

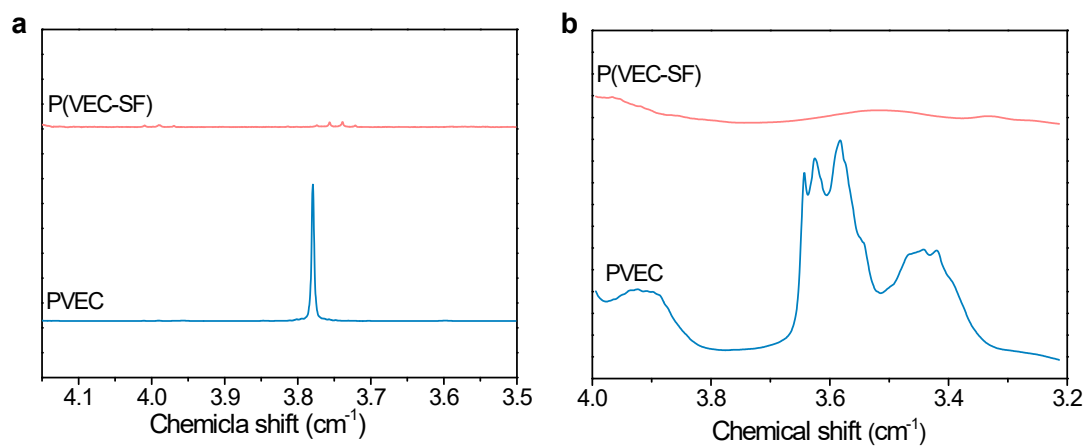

**Figure S19.** The **a**, liquid  $^1\text{H}$  NMR spectra and **b**, solid state  $^1\text{H}$  MAS-NMR spectra of PVEC-PE and P(VEC-SF)-PE after test.

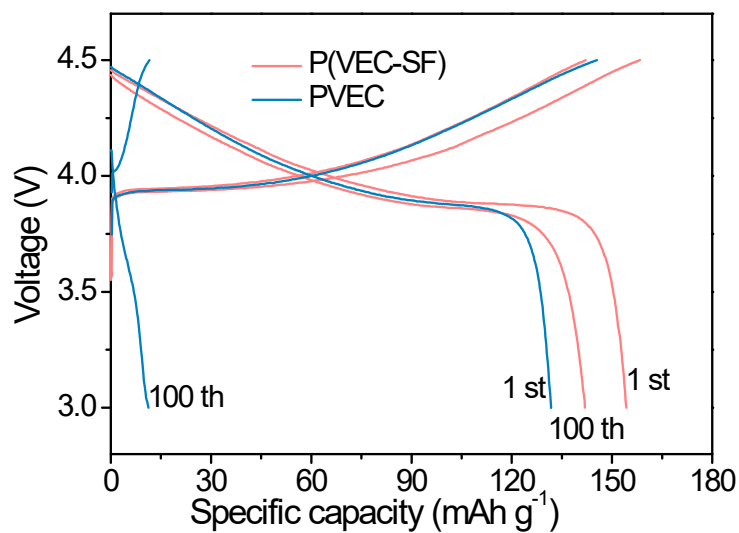

**Figure S20.** Comparisons of charge-discharge curves of the LCO/PVEC-PE/Li and LCO/P(VEC-SF)-PE/Li batteries at current density of 0.5 C.

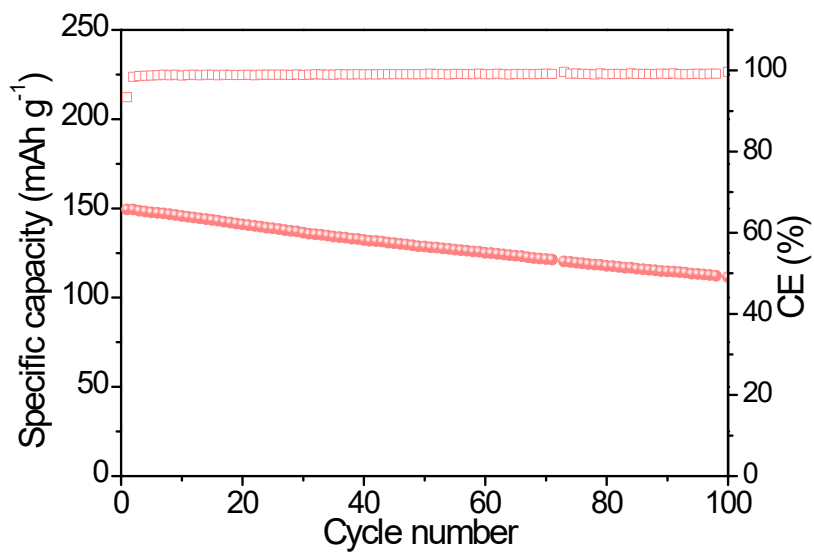

**Figure S21.** The cycling stabilities of LCO/P(VEC-SF)-PE/Li batteries at current density of 1 C.

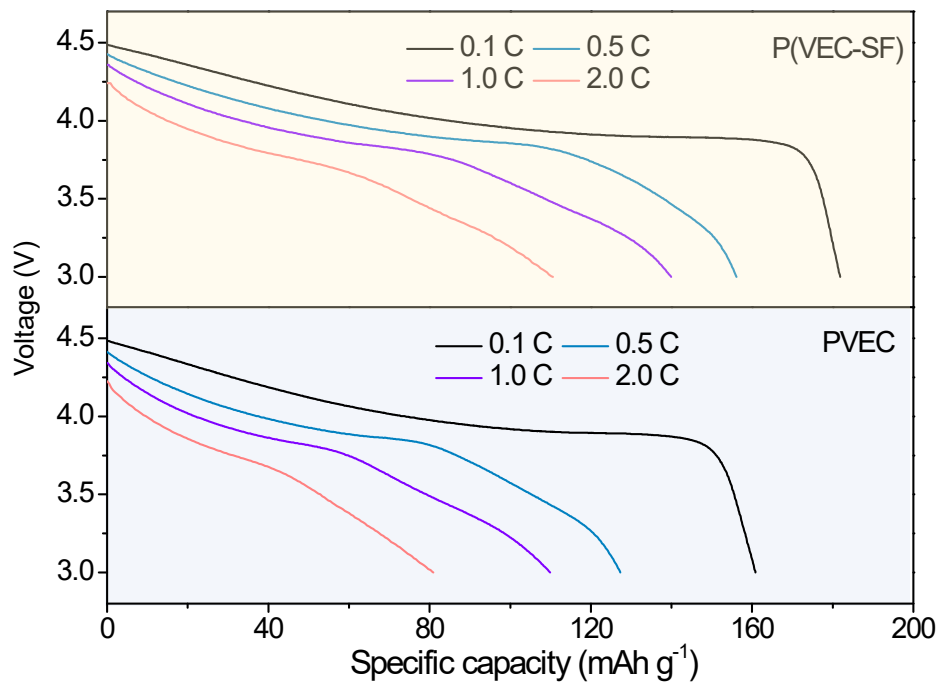

**Figure S22.** Discharge curves of LCO/PVEC-PE/Li and LCO/P(VEC-SF)-PE/Li battery at different density under cut-off voltage of 4.5 V.

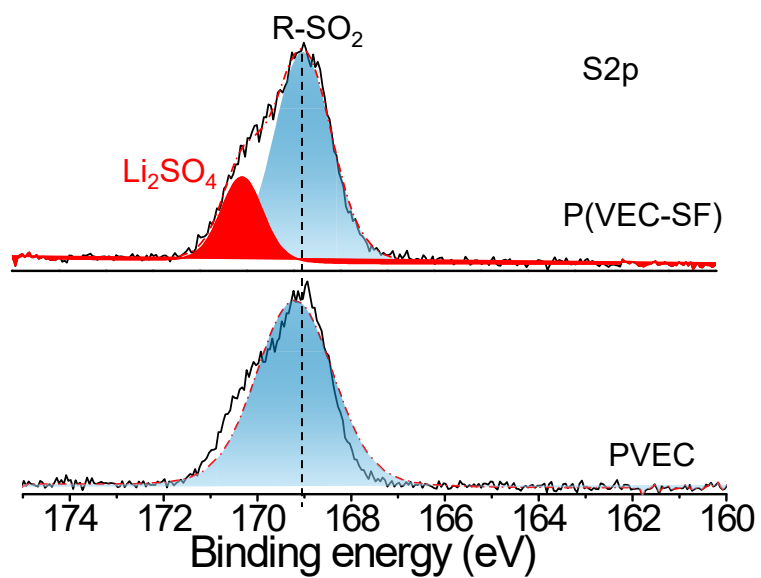

**Figure S23.** The S2p XPS spectra of PVEC and P(VEC-SF)-PE after tests.

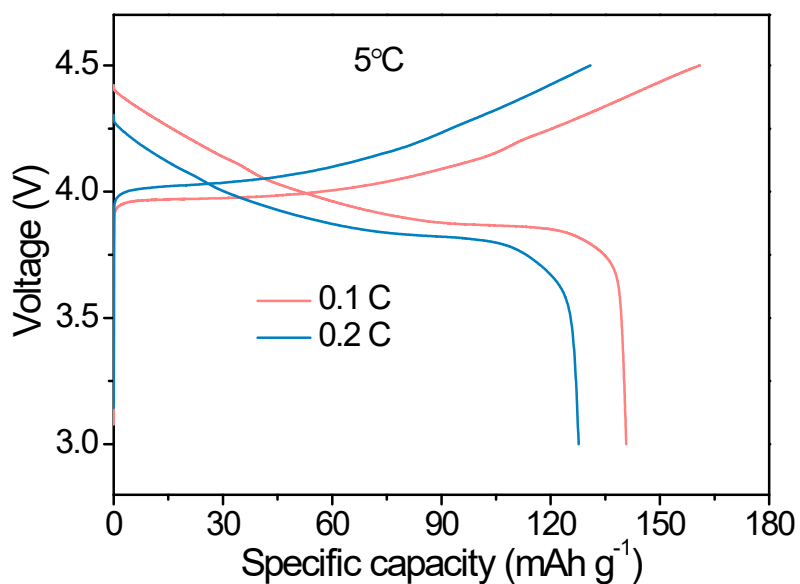

**Figure S24.** Charge-discharge curves of the LCO/P(VEC-SF)-PE/Li battery under different current densities at 5 °C.

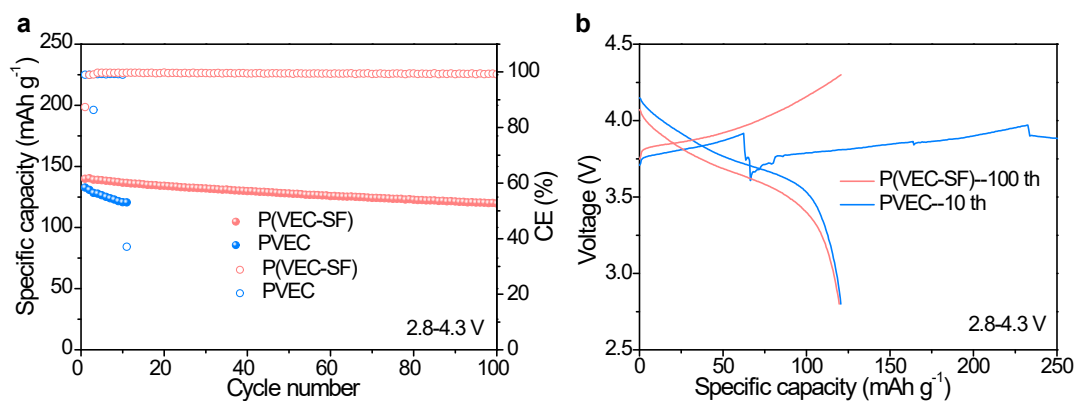

**Figure S25.** a, the cycling stabilities performances of NCM/PVEC-PE/Li batteries and NCM/P(VEC-SF)-PE/Li batteries with current densities of 1 C at constant voltage of 4.3 V. b, The charge/discharge curves of the NCM/PVEC-PE/Li batteries and NCM/P(VEC-SF)-PE/Li with current densities of 1 C at constant voltage of 4.3 V.

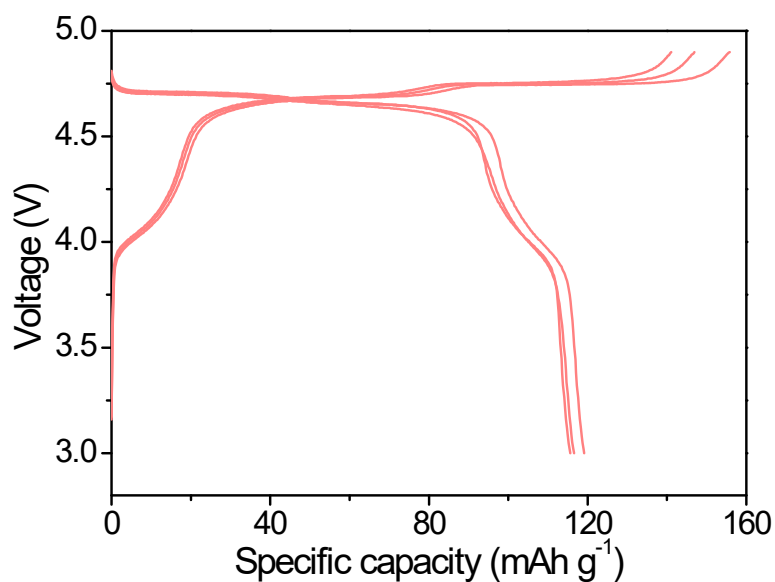

**Figure S26.** Charge-discharge curves of LNMO/P(VEC-SF)-PE/Li battery.

**Table S1.** The comparisons of this work with the latest published paper about polymer electrolyte lithium metal batteries.

| Polymer electrolyte | Solvent/additives                                 | Cothode materials | Cut-off voltage (V) | Rate (C) | Cycles | Capacity retention (%) | Ref       |
|---------------------|---------------------------------------------------|-------------------|---------------------|----------|--------|------------------------|-----------|
| PDOX                | ----                                              | NCM811            | 4.5                 | 1        | 100    | 84                     | 1         |
| PDOL                | ----                                              | NCM811            | 4.3                 | 1        | 100    | 70.6                   | 2         |
| PETEA-HFA-TCGG      | Liquid electrolyte                                | NCM811            | 4.5                 | 2        | 300    | 84                     | 3         |
| PVDF-HFP            | Mg <sub>2</sub> B <sub>2</sub> O <sub>5</sub> /PC | LCO               | 4.4                 | 0.5      | 50     | 76.8                   | 4         |
| PVEC/BTO            | ---                                               | LCO               | 4.3                 | 0.5      | 185    | 80                     | 5         |
| P(VEC-SF)           | ----                                              | LCO               | 4.5                 | 0.5      | 150    | 80                     | This word |

## References

1. Y. Liu, H. Zou, Z. Huang, Q. Wen, J. Lai, Y. Zhang, J. Li, K. Ding, J. Wang, Y.-Q. Lan and Q. Zheng, *Energy Environm. Sci.*, 2023, DOI: 10.1039/d3ee02797j.
2. A. Hu, Z. Liao, J. Huang, Y. Zhang, Q. Yang, Z. Zhang, L. Yang and S.i. Hirano, *Chemical Engineering Journal*, 2022, **448**, 137661.
3. J. Huang, Z. Shen, S. J. Robertson, Y. Lin, J. Zhu, K. Yang, Y. Wang, M. Shao and Z. Shi, *Chemical Engineering Journal*, 2023, **475**, 145802.
4. Y. Jing, Q. Lv, Y. Chen, B. Wang, B. Wu, C. Li, S. Yang, Z. He, D. Wang, H. Liu and S. Dou, *J. Energy Chem.*, 2024, DOI: 10.1016/j.jechem.2024.02.046.
5. L. Wu, H. Lv, R. Zhang, P. Ding, M. Tang, S. Liu, L. Wang, F. Liu, X. Guo and H. Yu, *ACS Nano*, 2024, **18**, 5498-5509.
